# Increased frequency of travel may act to decrease the chance of a global pandemic

## AUTHORS

R.N. Thompson<sup>1,2,3,\*</sup>, C.P. Thompson<sup>2</sup>, O. Peleman<sup>4</sup>, S. Gupta<sup>2</sup>, U. Obolski<sup>2,\*</sup>

\*Correspondence to: [robin.thompson@chch.ox.ac.uk](mailto:robin.thompson@chch.ox.ac.uk), [uri.obolski@zoo.ox.ac.uk](mailto:uri.obolski@zoo.ox.ac.uk)

## AFFILIATIONS

<sup>1</sup>Mathematical Institute, University of Oxford, Andrew Wiles Building, Radcliffe Observatory Quarter, Woodstock Road, Oxford OX2 6GG, UK

<sup>2</sup>Department of Zoology, University of Oxford, South Parks Road, Oxford OX1 3PS, UK

<sup>3</sup>Christ Church, University of Oxford, St Aldate's, Oxford OX1 1DP, UK

<sup>4</sup>The Chaim Rosenberg School of Jewish Studies, Tel Aviv University, Tel Aviv 69978, Israel

## ABSTRACT

The high frequency of modern travel has led to concerns about a devastating pandemic since a lethal pathogen strain could spread worldwide quickly. Many historical pandemics have arisen following pathogen evolution to a more virulent form. However, some pathogen strains invoke immune responses that provide partial cross-immunity against infection with related strains. Here, we consider a mathematical model of successive outbreaks of two strains – a low virulence strain outbreak followed by a high virulence strain outbreak. Under these circumstances, we investigate the impacts of varying travel rates and cross-immunity on the probability that a major epidemic of the high virulence strain occurs, and the size of that outbreak. Frequent travel between subpopulations can lead to widespread immunity to the high virulence strain, driven by exposure to the low virulence strain. As a result, major epidemics of the high virulence strain are less likely, and can potentially be smaller, with more connected subpopulations. Cross-immunity may be a factor contributing to the absence of a global pandemic as severe as the 1918 influenza pandemic in the century since.

## KEYWORDS

major epidemic; antigenic variation; cross-immunity; pathogen diversity; mathematical modelling

## 1. INTRODUCTION

Outbreaks of infectious disease are responsible for around 14 million deaths annually [1,2]. In recent years, there have been a number of epidemics that have sparked fears that a global pandemic might develop [3]. Outbreaks such as the 2013-16 Ebola epidemic in West Africa did not develop into a global pandemic [4]. Other outbreaks, for example the 2009 H1N1 influenza pandemic, have included cases in countries worldwide [5], but have not been as destructive as initially feared [6]. Historically, however, there have been severe global pandemics. The 1918 'Spanish flu' pandemic killed around 50 million people [7], and the 1958 and 1968 influenza pandemics caused around one million deaths each [8,9]. These outcomes viewed collectively raise a number of questions: how likely is a global pandemic now, and has the lack of a devastating global pandemic in recent years been simply a matter of luck?

A number of factors affect the pandemic potential when a pathogen first appears in a host population. These include the spatial distribution of hosts and the level of mixing between subpopulations [10,11]. When a pathogen enters a population, a high host density within subpopulations and a high contact rate between subpopulations are most likely to represent appropriate conditions for a major epidemic and lead to high epidemic growth rates [12-15]. The modern world increasingly satisfies these conditions, with growing population sizes and large numbers of individuals living in urban centres, as well as the high frequency of worldwide airline travel [16]. Hence, one might expect the probability of a global pandemic, as well as its potential severity, to be at an all-time high.

However, the determinants of the dynamics of infectious disease outbreaks are numerous and the above assertions ignore an important feature: cross-immunity obtained from pathogen exposures in previous outbreaks. Viral, bacterial and eukaryotic pathogens, such as the influenza virus, *Streptococcus pneumoniae* and the malaria parasite, evolve in an attempt to avoid control by the immune system [17,18] and in response to interventions such as vaccines [19-21]. Nonetheless, such immune evasion is not perfect. Hosts that have been infected by a particular strain and acquired immunity to that strain may also be at least partially cross-immune to infection with related strains [22-25]. Previous infections with immunologically related strains of a pathogen can therefore be beneficial to hosts, as they might provide protection against future infections with other potentially more virulent strains.

Cross-immunity between related pathogen strains has been shown to impact on pathogen dynamics and the structures of pathogen populations [26,27]. Cross-immunity might also be expected to affect the threat of a major epidemic. The 2009 H1N1 outbreak, for example, was not as destructive as feared, potentially as a result of decreased population susceptibility due to cross-immunity [28-31]. Here we develop a mathematical model to investigate the impact of cross-immunity on the chance of a major epidemic. We consider a general system emulating the dynamics of an outbreak of a pathogen of high virulence in two connected subpopulations, when cross-immunity is present from a previously circulating low virulence strain. We illustrate the principle that high rates of travel between subpopulations can decrease the probability of a major epidemic of a high virulence strain, and that the expected outbreak size can be either increased or decreased when there is a higher rate of travel between subpopulations. In a connected world, novel pathogens could spread worldwide through immunologically naïve populations extremely quickly. However, epidemics of existing pathogens may be less frequent, and potentially smaller, due to cross-immunity between pathogen strains – an important, but previously underappreciated, factor.

## 2. RESULTS

Motivated by the spread of pathogens between geographically separate regions, we considered pathogen transmission in a population consisting of two spatially distinct subpopulations (Fig 1). Two outbreaks were assumed to occur. First, an outbreak of a low virulence (LV) strain of the pathogen that has the potential to generate a large number of cases but that is unlikely to lead to a large number of deaths. Then, an outbreak of a related high virulence (HV) strain of the pathogen. Individuals infected in the first outbreak were partially cross-immune against infection in the second outbreak. It is the probability of a major epidemic of the HV strain and the possible final sizes of the HV strain outbreak that are our main concerns in this article.

**[Figure 1.** Schematic illustrating how outbreaks are simulated using the two-subpopulation model. Circles represent susceptible ( $S_1, S_2$ ), Infected ( $I_1, I_2$ ) and removed ( $R_1, R_2$ ) individuals in subpopulations 1 and 2, while the rates of transfer of individuals between these classes are given on the arrows connecting the circles (see Methods and Supplementary Material). An outbreak of the LV strain is assumed to occur, followed by an outbreak of the HV strain. Individuals infected in the LV strain outbreak are conferred cross-immunity at a level  $\alpha$  against infection with the HV strain.]

### Outbreak dynamics in a single subpopulation

We initially considered outbreak dynamics in a single population. When the HV strain arrived in the population, its effective reproduction number was reduced if individuals had previously been infected by the LV strain. The higher the cross-immunity (governed by the level of cross-immunity,  $0 \leq \alpha \leq 1$ ), the lower the effective reproduction number of the HV strain (Fig 2a). The higher the basic reproduction number of the LV strain,  $R_0^{LV}$ , the lower the expected effective reproduction number of the HV strain, since the LV strain would then have been likely to have generated more cases, leading to increased numbers of individuals partially cross-immune against the HV strain outbreak (Fig 2a).

Similarly, when the HV strain arrived in the population, the probability of a major epidemic (i.e. successful invasion of the host population) following decreased as the level of cross-immunity increased (Fig 2b), as did the final size of major epidemics of the HV strain (Fig 2c). The expected number of HV strain infections, accounting for the possibility that outbreaks may fade-out without becoming major epidemics, also decreased when the level of cross-immunity increased (Fig 2d). Furthermore, these quantities were also all reduced when the LV strain was more transmissible (see different lines in Figs 2b-d).

While the results in Figs 2a-d were obtained using analytic expressions (see Supplementary Material), we also considered stochastic simulations of the model. Figure 3 exemplifies a stochastic implementation of the model and supports the analytic result that cross-immunity lowers the probability of a major epidemic of the HV strain in addition to its final size. The results in Figs 3b-c can be compared with Figs 2b-c: for  $\alpha = 0$  and  $\alpha = 0.5$ , the probability of a major epidemic in Fig 2b when  $R_0^{LV} = 2$  takes the values 0.68 and 0.43, respectively – matching the percentage of outbreaks that are major epidemics in Figs 3b and 3c. Similarly, for  $\alpha = 0$  and  $\alpha = 0.5$ , the total numbers of infections in Fig 2c when  $R_0^{LV} = 2$  are 940 and 693, respectively – which are also consistent with the major epidemics simulated in Figs 3b-c.

**[Figure 2.** The impact of cross-immunity on outbreaks of the HV strain in a single population. (a) The effective reproduction number of the HV strain ( $R_e$ ); (b) The probability of a major epidemic of the HV strain; (c) The final size of the HV strain outbreak when a major epidemic occurs ( $R_e^{HV}(\infty)$ ); (d) The expected total number of individuals infected by the HV strain, allowing for the possibility of a major epidemic or fade-out without causing a major epidemic. The level of cross-immunity ( $\alpha$ ) is displayed on the x-axis, and lines represent different values of the basic reproduction number of the LV strain,  $R_0^{LV}$ . A major epidemic of the LV strain was assumed to occur prior to the arrival of the HV strain in the population. Outbreaks of the HV strain were seeded with a single infected individual, with all other individuals susceptible (either immunologically

naïve,  $S_1^N$ , or cross-immune following infection with the LV strain,  $S_1^I$ ). Parameter values:  
 $N = 1000$ ,  $\kappa = 1$ ,  $R_0^{HV} = 3$ . For a description of the parameters, see Table S2.]

**[Figure 3.** Cross-immunity leads to fewer and smaller major epidemics. Simulations of the model in a single population showing: (a) The LV strain major epidemic; (b) The subsequent HV strain outbreak, if there is no cross-immunity ( $\alpha = 0$ ); (c) As in panel b, but with cross-immunity ( $\alpha = 0.5$ ). Parameter values:  
 $N = 1000$ ,  $\kappa = 1$ ,  $\mu = 0.143 \text{ day}^{-1}$ ,  $\beta_{LV} = 2.86 \times 10^{-4} \text{ day}^{-1}$  (so that  $R_0^{LV} = 2$ ),  $\beta_{HV} = 4.29 \times 10^{-4} \text{ day}^{-1}$  (so that  $R_0^{HV} = 3$ ). For a description of the parameters, see Table S2. The blue regions represent quantiles of simulations of major epidemics and the red dotted line represents the median values. In panels b-c, there are also thin light blue areas at the bottoms of the panels showing outbreaks that fade-out without causing major epidemics. The light blue area is omitted in panel a, since we only consider major epidemics of the LV strain. Simulations are run in the same fashion as in the case of two connected subpopulations but with the rate of travel between subpopulations set to  $\lambda = 0$ , and with the outbreak always seeded with a single infected individual in the first subpopulation with the remaining  $N - 1$  individuals susceptible. In the HV strain epidemic, each susceptible individual is either immunologically naïve and in the class  $S_1^N$ , or cross-immune following infection with the LV strain and in the class  $S_1^I$ .]

### Outbreak dynamics in the two-subpopulation model

We then considered outbreak dynamics in two connected subpopulations and assessed the impact of the extent of travel between subpopulations (governed by the parameter  $\lambda$ ), as well as the inherent within-subpopulation transmissibility of the LV and HV strains (governed by the parameter  $\kappa$ ), on outbreaks of the HV strain. We considered the effects of these parameters on the probability of a major epidemic of the HV strain (Fig 4a-c), the final size of an outbreak if a major epidemic is assumed to occur (Fig 4d-f), and the expected final size accounting for the fact that outbreaks can either fade out as minor outbreaks or take off as major epidemics (Fig 4g-i). We found that increased rates

of travel between subpopulations led to a lower probability of a major epidemic of the HV strain. This is due to the probability of a major epidemic of the HV strain being governed by local susceptibility when the HV strain first arrives in the population. Thus, increased travel between subpopulations increases the probability that the LV strain has previously caused an epidemic in the subpopulation where the HV strain arrives and conferred some immunity against the HV strain in that subpopulation. The decreased chance of a major epidemic when between-subpopulation travel was increased was particularly pronounced when the strains driving the LV and HV epidemics were very transmissible and the level of cross-immunity was high (see rightmost region of Fig 4c, in which there is a large reduction in the probability of a major epidemic from the bottom to the top of the figure).

If the between-subpopulation connectivity was high when major epidemics occurred, those epidemics tended to be more severe (Fig 4d-e). This was not the case at very high levels of cross-immunity (Fig 4f). However, the expected total number of HV strain infections, accounting for the possibility that the outbreak either took off and became a major epidemic or faded out without spreading widely, was reduced as the extent of between-subpopulation travel increased when the level of cross-immunity was high (e.g. Fig 4h-i), but increased for low levels of cross-immunity (Fig 4g).

The outcome that the expected final size of major epidemics of the HV strain was unaffected by between-subpopulation travel when the level of cross-immunity was high (Fig 4f) can be explained as follows. The LV strain was assumed to always generate a major epidemic in subpopulation 1. In that subpopulation, the cross-immunity conferred was so high that a major epidemic of the HV strain could never occur in that subpopulation. Consequently, the only way that a major epidemic of the HV could occur in the overall population was if a major epidemic of the LV strain did not occur in subpopulation 2, and the HV strain outbreak was seeded in subpopulation 2 and went on to cause a major epidemic. Conditional on this scenario occurring, the size of that major epidemic would be unaffected by the rate of between-subpopulation travel, as can be seen in Fig 4f. The value in Fig 4f when  $\kappa = 1$  is 940 (cf. the leftmost value in Fig 2c).



**[Figure 4.** The impact of within- and between-subpopulation travel on outbreaks of the HV strain in the two-subpopulation model. The left, middle and right columns are results with the level of cross-immunity,  $\alpha$ , equal to 0.5, 0.7 and 0.9, respectively. (a)-(c): the probability of a major epidemic of the HV strain; (d)-(f): the expected final size of major epidemics of the HV strain; (g)-(i): the expected total number of the HV strain infections, allowing for the possibility of a major epidemic or fade-out without causing a major epidemic. A major epidemic of the LV strain is assumed to occur in at least one subpopulation and is seeded by a single infected individual in subpopulation 1 (see Fig 1 and Supplementary Material). Outbreaks of the HV strain are seeded with a single infected individual in a subpopulation chosen at random, with all other individuals in both subpopulations susceptible. Parameter values:  $N = 1000$  individuals per subpopulation, within-subpopulation basic reproduction numbers  $R_0^{LV} = 2\kappa$ ,  $R_0^{HV} = 3\kappa$ . For a description of the parameters, see Table S2.]

We also verified that our results in Fig 4, which were derived numerically for computational efficiency and based on analytical expressions (see Supplementary Material), matched the results of stochastic simulations (we show results analogous to the middle column of Fig 4 in Fig S1).

### 3. DISCUSSION

The large increase in international travel over the last century might be assumed to have resulted in a high chance of a devastating global pandemic (see e.g. [32]). Here we have used a general epidemiological model to demonstrate that an important, yet often overlooked, factor in the dynamics of a newly introduced high-virulence (HV) pathogen strain is partial immunity driven by exposures to related pathogen strains. When a HV pathogen strain arrives in a population following an epidemic of a related but low virulence (LV) strain, the probability of a major epidemic of the HV strain is decreased. High rates of travel between spatially distinct subpopulations can drive



larger outbreaks of low virulence pathogens, in turn providing higher levels of immunity if/when a HV strain, which has the potential to cause a devastating epidemic, appears in the population (Fig 4a-c).

Not only did we find that the probability of a major epidemic of the HV strain decreases when travel between subpopulations increases, but the expected final size of the HV strain outbreak can also be reduced. This was particularly pronounced when the level of cross-immunity between strains was high (Fig 4i), since lower cross-immunity levels combined with high travel rates can lead to large epidemics due to increased mixing between subpopulations (Fig 4g). When between-subpopulation travel was increased, the reduction in the probability of a major epidemic of the HV strain, and the expected size, was largely due to cross-immunity reducing the proportion of outbreaks that proceeded to become major epidemics. If/when major epidemics occurred, we found that they were typically larger when there was more travel between regions (Fig 4d-e), although this was not always the case, particularly when the level of cross-immunity was very high (Fig 4f).

Partial cross-immunity against a highly virulent strain from prior exposure to a less virulent strain is characteristic of influenza outbreaks in different seasons. For example, it has been suggested that individuals born before 1890 were protected against the 1918 H1N1 pandemic due to the outbreak in 1889-90 [33] and that individuals infected with multiple historical seasonal H1N1 influenza strains were protected against the 2009 H1N1 influenza pandemic strain [34]. Our results suggest that cross-immunity might be a potential explanatory factor as to why there has not been a pandemic as devastating as the 1918 influenza epidemic in the century since, despite the emergence of a strain antigenically similar to the 1918 pandemic strain in 2009. Travel rates increased substantially during the 20<sup>th</sup> century. As a theoretical exercise, we obtained crude estimates of the travel rates from Europe to the USA, comparing rates during the early 20th century with current travel rates. For the early 20<sup>th</sup> century rates, we used registry statistics from USA ports from 1914 to 1924 (see Supplementary Material Section 5). Oceanic travel should approximate overall trans-Atlantic travel in this time period, as

other modes of long-distance travel were extremely rare. This yielded the approximation  $\lambda \approx 3.6 \cdot 10^{-6}$  per day. Conversely, when estimating current rates of travel from European countries to the USA, approximated using data on air travel, we obtain much higher values of  $\lambda \approx 3.7 \cdot 10^{-4}$  per day. It might be expected that such a significant rise in travel in this time period might have reduced the risk of a global pandemic of a pathogen with circulating strains that induce cross-immunity.

Cross-immunity is known to affect the dynamics of outbreaks of various pathogens. *Vibrio cholera*, for example, exhibits almost complete cross-immunity between strains (a study by Koelle *et al.* [35] used a cross-immunity level of  $\alpha = 0.955$ ). On the other hand, human Respiratory Syncytial Virus (hRSV) has been shown to provide incomplete cross-immunity against infections from the same virus group ( $\alpha \approx 0.6$ , [36]). It also provides low levels of cross-immunity against hRSV infections from different virus groups ( $\alpha \approx 0.16$ , [36]), and partial cross-immunity against infections with human Parainfluenza Virus [37].

While we have chosen to focus on pathogens affecting human populations, we note that cross-immunity might also impact on the pandemic potential for pathogens of animals and plants. Cross-immunity between pathogen strains is a feature of pathogens of animals including *Trypanosoma congolense* [38] and pathogens of plants including Tobacco mosaic virus and Potato virus X [39]. Furthermore, the effect of cross-immunity on plant or animal disease outbreaks might also be changing due to alterations in the worldwide movement of hosts. For example, climate change appears to be modifying the spatial distributions of animal populations [40] and the plant nursery trade is more active than ever before [41]. We also note that, while we focussed on cross-immunity between different pathogen strains, a related concept is protection against reinfection with the same (or very similar) strain – often referred to as homologous interference or superinfection exclusion – which has been demonstrated for a number of pathogens of plants or animals [42].

We aimed here to develop the simplest model possible characterising the spread of a pathogen between spatially distinct populations. For assessing the probability of a major epidemic of a specific virulent strain of a pathogen in a particular host population, the model would need to be extended and adjusted. For example, the process of mutation of the pathogen from the low virulence strain to the high virulence strain may have to be modelled explicitly. If the mutation occurs a long period after the previous major epidemic of the non-virulent strain, cross-immunity might be expected to have waned compared to if the low and high virulent strain epidemics occur in quick succession. The cumulative effects of a number of past outbreaks of different related strains might also have to be considered when a high virulence strain enters a host population [25,34]. Different types of partial cross-immunity could be considered. Here we have assumed that exposure to the LV strain reduces the probability of infection with the HV strain, whereas for some infections cross-immunity may instead (or also) act to reduce the severity of disease [43,44]. As an example, epidemiological isolation leading to high mortality rates of infections may explain the mass mortality in pacific island populations between the 16<sup>th</sup> and 19<sup>th</sup> centuries [45].

Nonetheless, we have demonstrated the principle that increased global travel might not necessarily mean that large pandemics are more likely in the present day than previously. On the contrary, our results demonstrate that there may exist conditions under which increased travel between subpopulations might reduce the probability and size of major epidemics. The size of an epidemic of an entirely new pathogen, or a strain that is antigenically distinct from previous circulating strains, is likely to be larger when there is more travel. This is because the pathogen would then be entering a population that is immunologically naïve and additional mixing provides the opportunity for more transmission events. However, we have focussed on epidemics occurring due to variants of pre-existing pathogens since these have driven a substantial number of past pandemics. Predicting which pathogen is likely to cause the next major pandemic is challenging [46]. Our study has led us to support the assertion of the World Health Organisation that the pandemic threat is greatest from an unknown strain of a known

pathogen, or a pathogen that we have not previously encountered, the so-called disease X [47].

## 4. METHODS

### Mathematical model

#### *LV strain outbreak*

We first considered an outbreak of a low virulence (LV) strain. Individuals were classified according to whether they were (*S*)usceptible to the LV strain, (*I*)nfected, or (*R*)ecovered and immune to that strain. Within a single subpopulation, the deterministic SIR model is given by

$$\begin{aligned}\frac{dS}{dt} &= -\beta_{LV}\kappa IS, \\ \frac{dI}{dt} &= \beta_{LV}\kappa IS - \mu I, \\ \frac{dR}{dt} &= \mu I.\end{aligned}\tag{1}$$

The parameter  $\kappa$  is a proxy for the frequency of within-subpopulation travel and governs the magnitude of the contact rate within the subpopulation. This parameter is also used in the subsequent high virulence (HV) strain outbreak (see below). The LV strain epidemic was assumed to follow stochastic SIR dynamics, analogous to the system of equations (1) within each subpopulation, with individuals also travelling between subpopulations at rate  $\lambda$  per day (see Fig 1 and Supplementary Material).

#### *HV strain outbreak*

We then considered a subsequent outbreak of the HV strain in the population, that is also governed by stochastic SIR dynamics in each subpopulation but extended to account for cross-immunity.

Individuals infected in the LV strain epidemic were partially protected against the HV strain epidemic. The extent of immunity against the HV strain conferred by the LV strain was governed by a parameter  $0 \leq \alpha \leq 1$ , which changed the probability of successful infection by a multiplicative factor  $1 - \alpha$  if the host had previously been infected by the LV strain compared to if the host had not previously been infected by the LV strain. The value  $\alpha = 0$  thereby corresponded to no cross-immunity,  $\alpha = 1$  corresponded to complete cross-immunity, and intermediate values of  $\alpha$  corresponded to partial cross-immunity.

Individuals were classified according to whether they were ( $S_N$ ) susceptible and not partially cross-immune against the HV strain, ( $S_I$ ) susceptible and partially cross-immune, ( $I$ ) infected, or ( $R$ ) recovered and immune to that strain or dead. The deterministic analogue in a single subpopulation to the model that we considered to represent the HV strain outbreak is

$$\begin{aligned}\frac{dS_N}{dt} &= -\beta_{HV}\kappa IS_N, \\ \frac{dS_I}{dt} &= -\beta_{HV}\kappa(1 - \alpha)IS_I, \\ \frac{dI}{dt} &= \beta_{HV}\kappa IS_N + \beta_{HV}\kappa(1 - \alpha)IS_I - \mu I, \\ \frac{dR}{dt} &= \mu I.\end{aligned}\tag{2}$$

When the HV strain arrived in the subpopulation, initial cases could either develop into a major epidemic or fade-out as a minor outbreak. The within-subpopulation basic reproduction numbers of the LV and HV strains were denoted by  $R_0^{LV}$  and  $R_0^{HV}$ , respectively (see Supplementary Material). In the HV strain outbreak, like in the

previous LV strain outbreak, we also assumed that individuals travelled between subpopulations at rate  $\lambda$  per day (see Fig 1).

## Background theory

Before considering the full model, we derived the probability of a major epidemic and the expected final size conditional on a major epidemic when the pathogen first arrived in a subpopulation, ignoring any effects of migration between subpopulations.

### *LV strain epidemic*

When the LV strain, with within-subpopulation basic reproduction number  $R_0^{LV} > 1$ , arrived in a single fully susceptible population, the probability of a major epidemic following was approximately

$$\text{Prob}(\text{major epidemic}) \approx 1 - \left( \frac{1}{R_0^{LV}} \right)^{I(0)},$$

where  $I(0)$  is the number of infected hosts that were infected initially (see e.g. [48,49]).

If a major epidemic occurred, the expected number of individuals infected over the course of the epidemic was approximated by the solution,  $R^{LV}(\infty)$ , of the final size equation (see equation (S3) in the Supplementary Material),

$$R^{LV}(\infty) = N - N \exp \left( \frac{-R_0^{LV} R^{LV}(\infty)}{N} \right).$$

### *HV strain epidemic*

When the HV strain appeared in a subpopulation, if a major epidemic of the LV strain had not occurred in that subpopulation, then the probability of a major epidemic was

416

$$\mathbb{P}(\text{major epidemic}) \approx 1 - \left( \frac{1}{R_0^{HV}} \right)^{I(0)},$$

417

418 whenever  $R_0^{HV} > 1$ , where  $I(0)$  is the initial number of hosts infected by the HV strain at  
419 the start of the HV strain outbreak. The final size if a major epidemic occurred was then  
420 given by the solution,  $R_0^{HV}(\infty)$ , of the final size equation

421

$$R_0^{HV}(\infty) = N - N \exp \left( \frac{-R_0^{HV} R_0^{HV}(\infty)}{N} \right).$$

422

423 However, when the HV strain arrived in the subpopulation, if a major epidemic of the LV  
424 strain had occurred previously, then the population was not fully susceptible due to  
425 partial cross-immunity. The effective reproduction number of the HV strain when it  
426 arrived in the population was then  $R_e = \frac{\beta_{HV}\kappa(1-\alpha x)N}{\mu}$ , where  $x = \frac{R^{LV}(\infty)}{N}$  is the proportion of  
427 individuals infected in the LV strain epidemic (see Supplementary Material Section 2).

428

429 The resulting probability of a major epidemic of the HV strain was then

430

$$\mathbb{P}(\text{major epidemic}) \approx 1 - \left( \frac{1}{R_e} \right)^{I(0)},$$

431

432 whenever  $R_e > 1$ , and if a major epidemic occurred, the final size was approximated by  
433 numerically solving the system of equations (2).

434

435

### 436 Possible outcomes of LV and HV strain outbreaks in two subpopulations

437

438 When we considered the full model, consisting of two subpopulations (denoted 1 and 2),  
439 we assumed without loss of generality that the LV strain arrived in subpopulation 1.

440 Since we were only interested in the effect of cross-immunity on outbreaks of the HV



strain, we assumed that the LV strain successfully invaded the population. As a result, a major epidemic of the LV strain occurred in subpopulation 1.

Eight outcomes were then possible (see Table S1). A major epidemic of the LV strain may or may not occur in subpopulation 2. Then, major epidemics of the HV may or may not occur in each of subpopulations 1 and 2. Calculation of the probabilities of each of these outcomes, as well as the expected numbers of individuals infected by the LV and HV strains in each subpopulation, are described in the Supplementary Material.

## REFERENCES

1. Taylor LH, Latham SM, Mark EJ. 2001 Risk factors for human disease emergence. *Phil. Trans. R. Soc. B* **356**: 983-989.
2. Dye C. 2014 After 2015: infectious diseases in a new era of health and development. *Phil. Trans. R. Soc. B* **369**, 20130426.
3. Reperant LA, Osterhaus AD. 2017 AIDS, Avian flu, SARS, MERS, Ebola, Zika... what next? *Vaccine* **35**, 4470-4474.
4. Coltart CE, Lindsey B, Ghinai I, Johnson AM, Heymann DL. 2017 The Ebola outbreak, 2013–2016: old lessons for new epidemics. *Phil. Trans. R. Soc. B* **372**, 20160297.
5. Girard MP, Tam JS, Assossou OM, Kieny MP. 2010 The 2009 A (H1N1) influenza virus pandemic: A review. *Vaccine* **28**, 4895-4902.
6. SteelFisher GK, Blendon RJ, Bekheit MM, Lubell K. 2010 The public's response to the 2009 H1N1 influenza pandemic. *New Eng. J. Med.* **362**, e65.
7. Johnson NP, Mueller J. 2002 Updating the accounts: global mortality of the 1918-1920 "Spanish" influenza pandemic. *Bull. Hist. Med.* **76**, 105-115.
8. Kilbourne ED. 2006 Influenza Pandemics of the 20th Century. *Emerg. Infect. Dis.* **12**, 9-14.
9. Saunders-Hastings PR, Krewski D. 2016 Reviewing the history of pandemic influenza: understanding patterns of emergence and transmission. *Pathogens* **5**, 66.
10. Getz WM, Lloyd-Smith JO, Cross PC, Bar-David S, Johnson PL, Porco TC, Sánchez MS. 2006 "Modeling the invasion and spread of contagious diseases in

- heterogeneous populations” in *Disease Evolution: Models, Concepts, and Data Analyses*, ed. Z Feng, U Dieckmann, SA Levin (DIMACS), 113-144.
11. Engering A, Hogerwerf L, Slingenbergh J. 2013 Pathogen-host-environment interplay and disease emergence. *Emerg. Microbes Infect.* **2**, e5.
12. Gupta S, Anderson RM, May RM. 1989 Networks of sexual contacts: implications for the pattern of spread of HIV. *AIDS* **3**, 807-817.
13. Woolhouse ME, Shaw DJ, Matthews L, Liu WC, Mellor DJ, Thomas MR. 2005 Epidemiological implications of the contact network structure for cattle farms and the 20–80 rule. *Biol. Letters* **1**, 350-352.
14. Keeling MJ. 2005 The implications of network structure for epidemic dynamics. *Theor. Pop. Biol.* **67**, 1-8.
15. Woolhouse ME. 2011 How to make predictions about future infectious disease risks. *Phil. Trans. Roy. Soc. B* **366**, 2045-2054.
16. Mangili A, Gendreau MA. 2005 Transmission of infectious diseases during commercial air travel. *Lancet* **365**, 989-996.
17. Vossen MT, Westerhout EM, Söderberg-Nauclér C, Wiertz EJ. 2002 Viral immune evasion: a masterpiece of evolution. *Immunogenetics* **54**, 527-542.
18. Finlay BB, McFadden G. 2006 Anti-immunology: evasion of the host immune system by bacterial and viral pathogens. *Cell* **124**, 767-782.
19. Smith DJ, Lapedes AS, de Jong JC, Bestebroer TM, Rimmelzwaan GF, Osterhaus AD, Fouchier RA. 2004 Mapping the antigenic and genetic evolution of influenza virus. *Science* **305**, 371-376.
20. Gandon S, Mackinnon MJ, Nee S, Read AF. 2001 Imperfect vaccines and the evolution of pathogen virulence. *Nature* **414**, 751-756.
21. Obolski U, Lourenço J, Thompson CP, Thompson RN, Gori A, Gupta S. 2018 Vaccination can drive an increase in frequencies of antibiotic resistance among nonvaccine serotypes of *Streptococcus pneumoniae*. *Proc. Natl. Acad. Sci.* **6**, 201718712.
22. Gog JR, Grenfell BT. 2002 Dynamics and selection of many-strain pathogens. *Proc. Natl. Acad. Sci.* **99**, 17209-17214.
23. Grenfell BT, Pybus OG, Gog JR, Wood JL, Daly JM, Mumford JA, Holmes EC. 2004 Unifying the epidemiological and evolutionary dynamics of pathogens. *Science* **303**, 327-332.

- 505 24. Reich NG, Shrestha S, King AA, Rohani P, Lessler J, Kalayanarooj S, Yoon IK,  
506 Gibbons RV, Burke DS, Cummings DA. 2013 Interactions between serotypes of dengue  
507 highlight epidemiological impact of cross-immunity. *J. R. Soc. Interface* **10**, 20130414.
- 508 25. Thompson CP, Lourenço J, Walters AA, Obolski U, Edmans M, Palmer DS, Kooblall  
509 K, Carnell GW, O'Connor D, Bowden TA, *et al.* 2018 An epitope of limited variability as  
510 a novel influenza vaccine target. *bioRxiv*.
- 511 26. Gupta S, Maiden MC, Feavers IM, Nee S, May RM, Anderson RM. 1996 The  
512 maintenance of strain structure in populations of recombining infectious agents. *Nature*  
513 *Med.* **2**, 437-442.
- 514 27. Gupta S, Ferguson N, Anderson R. 1998 Chaos, persistence, and evolution of strain  
515 structure in antigenically diverse infectious agents. *Science* **280**, 912-915.
- 516 28. Hancock K, Veguilla V, Lu X, Zhong W, Butler EN, Sun H, Liu F, Dong L, DeVos JR,  
517 Gargiullo PM, *et al.* 2009 Cross-reactive antibody responses to the 2009 pandemic  
518 H1N1 influenza virus. *New Eng. J. Med.* **361**, 1945-1952.
- 519 29. Zimmer SM, Crevar CJ, Carter DM, Stark JH, Giles BM, Zimmerman RK, Ostroff  
520 SM, Lee BY, Burke DS, Ross TM. 2010 Seroprevalence following the second wave of  
521 pandemic 2009 H1N1 influenza in Pittsburgh, PA, USA. *PLoS One* **5**, e11601.
- 522 30. Ikonen N, Strengell M, Kinnunen L, Österlund P, Pirhonen J, Broman M, Davidkin I,  
523 Ziegler T, Julkunen I. 2010 High frequency of cross-reacting antibodies against 2009  
524 pandemic influenza A(H1N1) virus among the elderly in Finland. *Euro Surveill.* **15**,  
525 19478.
- 526 31. Miller MS, Gardner TJ, Krammer F, Aguado LC, Tortorella D, Basler CF, Palese P.  
527 Neutralizing antibodies against previously encountered influenza virus strains increase  
528 over time: A longitudinal analysis. *Sci. Transl. Med.* **5**, 198ra107.
- 529 32. Cooper BS, Pitman RJ, Edmunds WJ, Gay NJ. 2006 Delaying the international  
530 spread of pandemic influenza. *PLoS Med.* **3**, e212.
- 531 33. Gagnon A, Miller MS, Hallman SA, Bourbeau R, Herring DA, Earn DJ, Madrenas J.  
532 2013 Age-specific mortality during the 1918 influenza pandemic: Unravelling the  
533 mystery of high young adult mortality. *PLoS One* **8**, e69586.
- 534 34. Carter DM, Bloom CE, Nascimento EJ, Marques ET, Craigo JK, Cherry JL, Lipman  
535 DJ, Ross TM. 2013 Sequential seasonal H1N1 influenza virus infections protect ferrets  
536 against novel 2009 H1N1 influenza virus. *J. Virol.* **87**, 1400-1410.
- 537 35. Koelle K, Pascual M, Yunus M. 2006 Serotype cycles in cholera dynamics. *Proc.*  
538 *Roy. Soc. Lond. B* **273**, 2879-2886.

- 539 36. White LJ, Waris M, Cane PA, Nokes DJ, Medley GF. 2005 The transmission  
540 dynamics of groups A and B human respiratory syncytial virus (hRSV) in England &  
541 Wales and Finland: seasonality and cross-protection. *Epidem. Infect.* **133**, 279-289.
- 542 37. Bhattacharyya S, Gesteland PH, Korgenski K, Bjørnstad ON, Adler FR. 2015 Cross-  
543 immunity between strains explains the dynamical pattern of paramyxoviruses. *Proc.*  
544 *Natl. Acad. Sci.* **112**, 13396-400.
- 545 38. Masumu J, Marcotty T, Geerts S, Vercruysse J, Van den Bossche P. 2009 Cross-  
546 protection between *Trypanosoma congolense* strains of low and high virulence. *Vet.*  
547 *Parasitol.* **163**, 127-131.
- 548 39. Gal-On A, Shibolet Y. 2006 "Cross protection" in *Natural Resistance*  
549 *Mechanisms of Plants to Viruses*, ed. G Loebenstein, JP Carr (Dordrecht: Springer),  
550 261–288.
- 551 40. Walther GR, Post E, Convey P, Menzel A, Parmesan C, Beebee TJ, Fromentin JM,  
552 Hoegh-Guldberg O, Bairlein F. 2002 Ecological responses to recent climate change.  
553 *Nature* **416**, 389-395.
- 554 41. Liebhold AM, Brockerhoff EG, Garrett LJ, Parke JL, Britton KO. 2012 Live plant  
555 imports: the major pathway for forest insect and pathogen invasions of the US. *Frontiers*  
556 *Ecol. Environ.* **10**, 135-143.
- 557 42. Folimonova SY, Robertson CJ, Shilts T, Folimonov AS, Hilf ME, Garnsey SM,  
558 Dawson WO. 2010 Infection with strains of Citrus tristeza virus does not exclude  
559 superinfection by other strains of the virus. *J. Virol.* **84**, 1314-1325.
- 560 43. Gupta S, Snow RW, Donnelly CA, Marsh K, Newbold C. 1999 Immunity to non-  
561 cerebral severe malaria is acquired after one or two infections. *Nature Med.* **5**, 340-343.
- 562 44. Hellriegel B. 2001 Immunoepidemiology – bridging the gap between immunology  
563 and epidemiology. *Trends Parasitol.* **17**, 102-106.
- 564 45. Penman BS, Gupta S, Shanks GD. 2017 Rapid mortality transition of Pacific Islands  
565 in the 19th century. *Epidem. Infect.* **145**, 1-11.
- 566 46. Holmes EC, Rambaut A, Andersen KG. 2018 Pandemics: Spend on surveillance,  
567 not prediction. *Nature* **558**, 180-182.
- 568 47. World Health Organization. 2018 Annual review of diseases prioritized under the  
569 research and development blueprint. Accessible at  
570 <http://www.who.int/emergencies/diseases/2018prioritization-report.pdf?ua=1>.
- 571 48. Keeling MJ, Rohani P. 2007 *Modeling Infectious Diseases in Humans and Animals*.  
572 Princeton University Press.

49. Thompson RN, Gilligan CA, Cunliffe NJ. 2016 Detecting presymptomatic infection is necessary to forecast major epidemics in the earliest stages of infectious disease outbreaks. *PLoS Comp. Biol.* **12**, e1004836.

## COMPETING INTERESTS

We have no competing interests.

## AUTHORS' CONTRIBUTIONS

RNT and SG conceived the research; All authors designed the study; RNT and UO carried out the research; RNT drafted the manuscript; All authors revised the manuscript and gave final approval for publication.

## ACKNOWLEDGEMENTS

Thanks to members of the Department of Zoology and Mathematical Institute in Oxford for helpful discussions about this project.

## FUNDING

RNT was funded by a Junior Research Fellowship from Christ Church, Oxford. UO was supported by an EMBO postdoctoral fellowship. CPT was supported by the European Union's Seventh Framework Programme (FP7/2007-2013)/European Research Council (614725-PATHPHYLODYN).

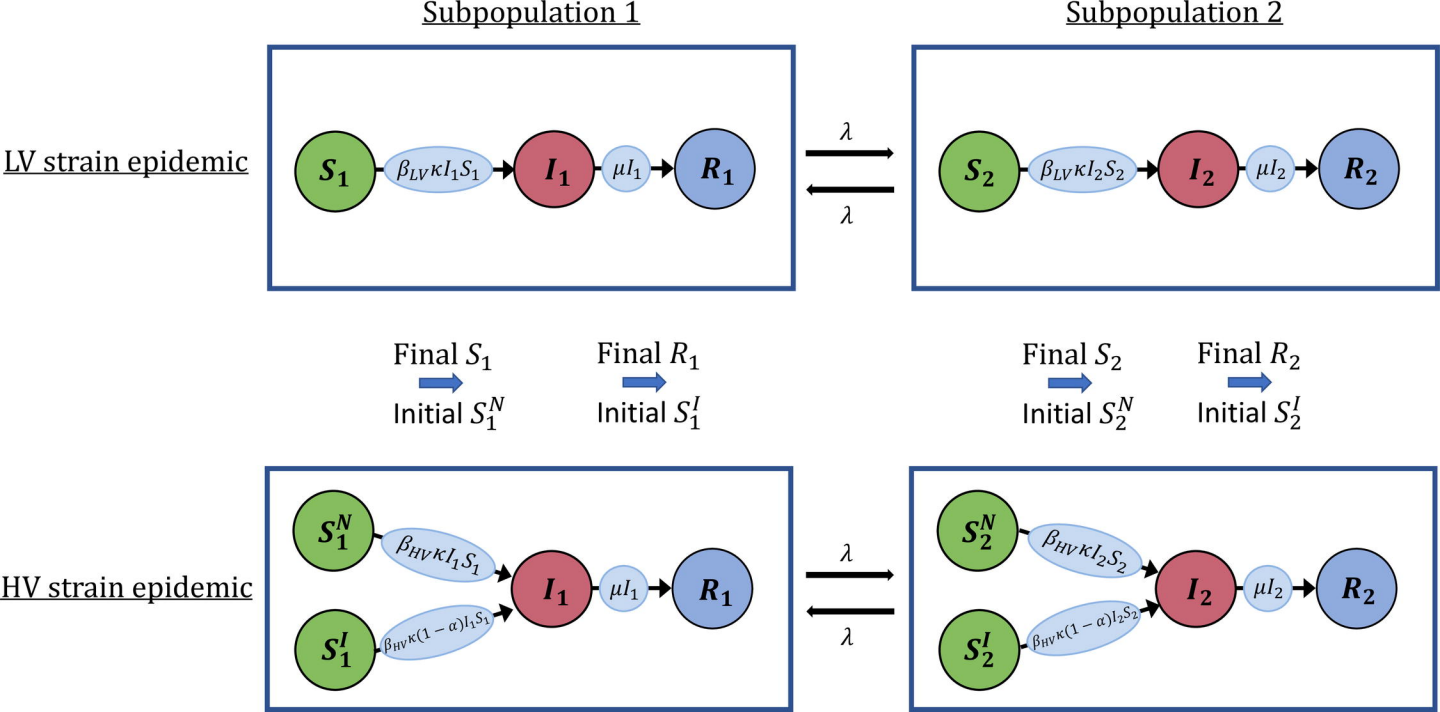

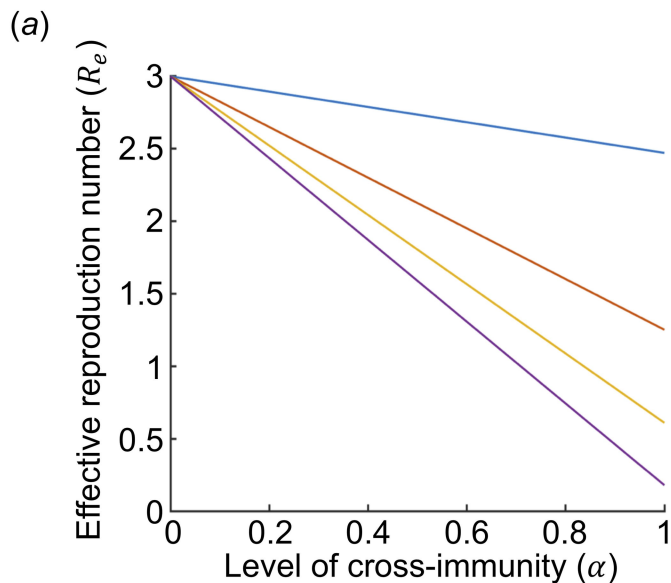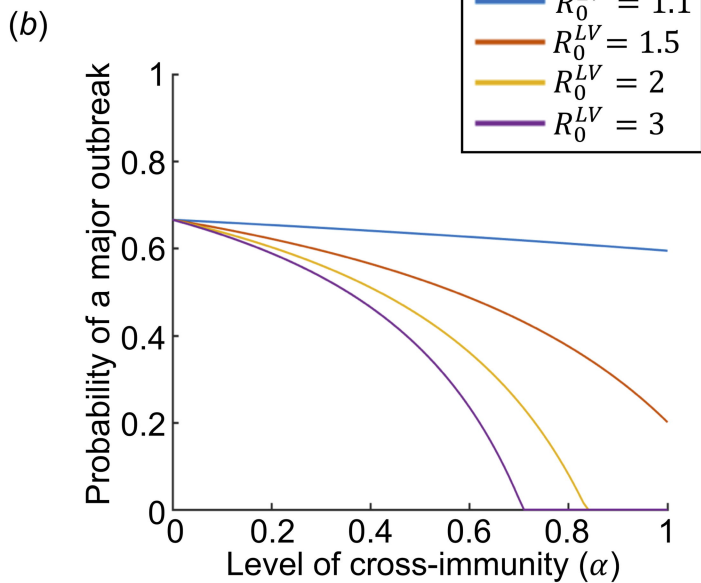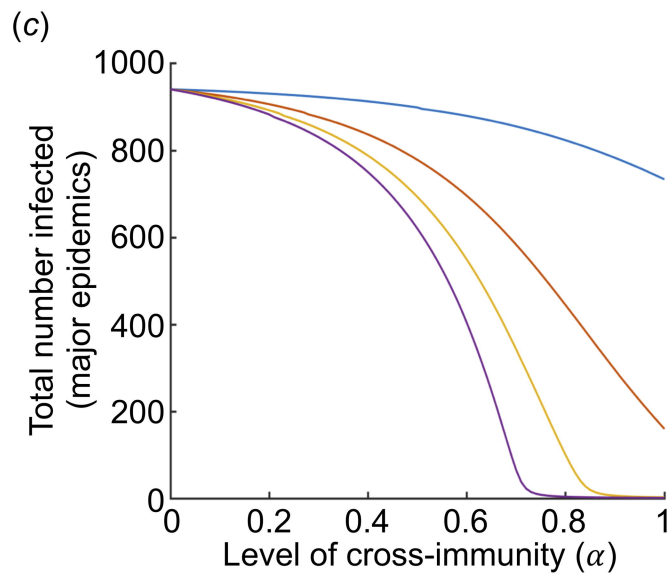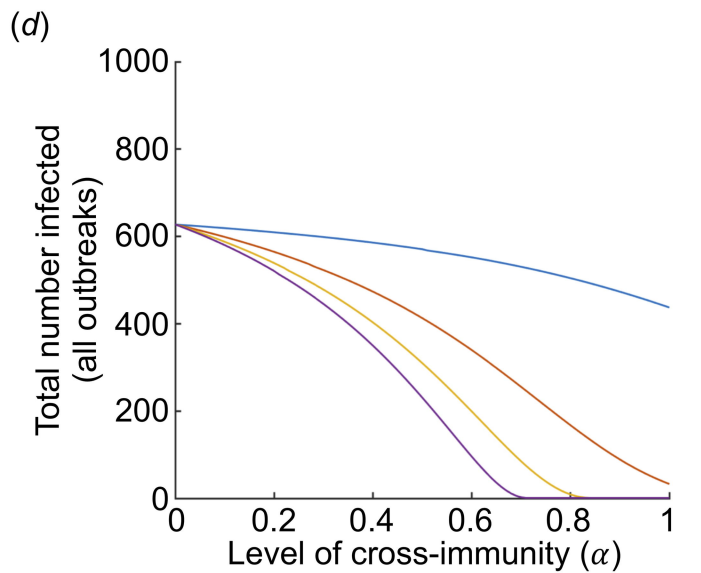



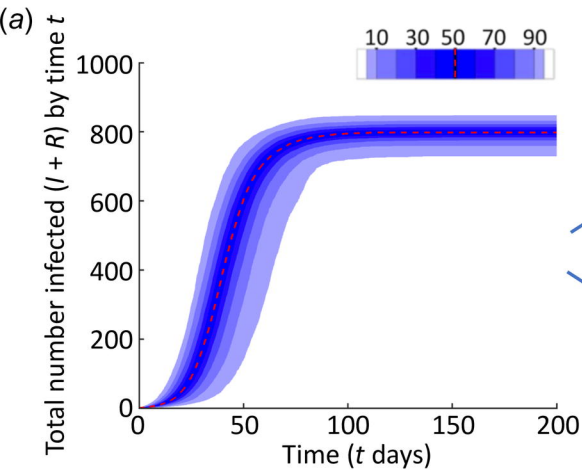

Without  
cross-immunity  
( $\alpha = 0$ )

With  
cross-immunity  
( $\alpha = 0.5$ )

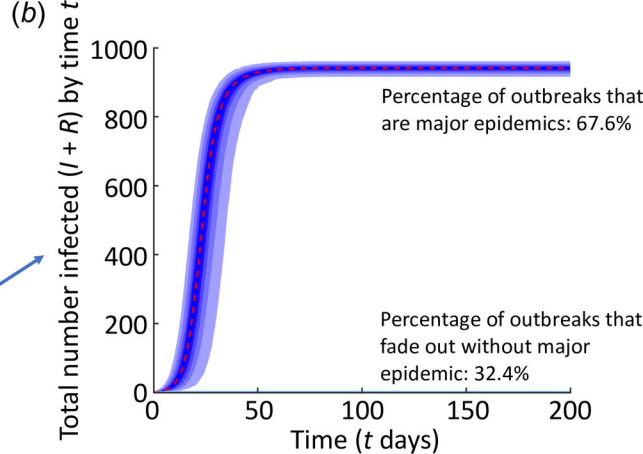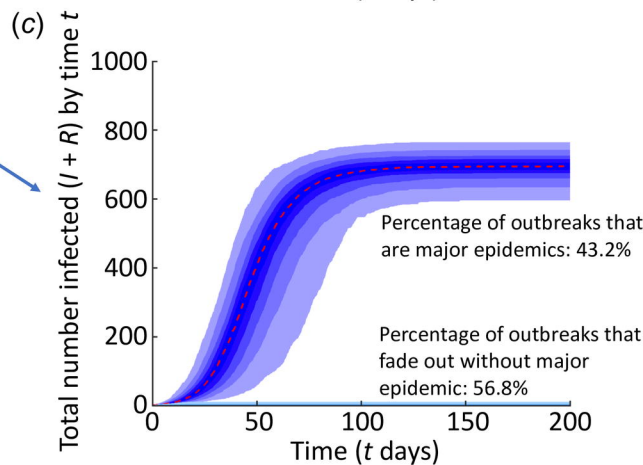

Low cross-immunity ( $\alpha = 0.5$ )

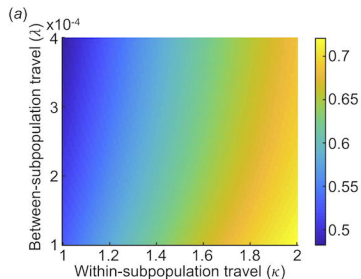

Intermediate cross-immunity ( $\alpha = 0.7$ )

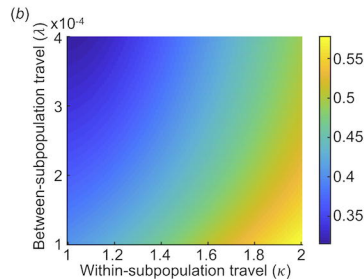

High cross-immunity ( $\alpha = 0.9$ )

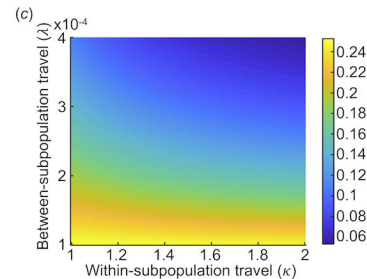

Probability of a  
major outbreak

Total number infected  
(major epidemics)

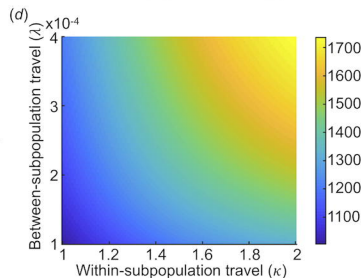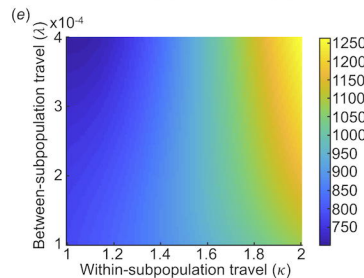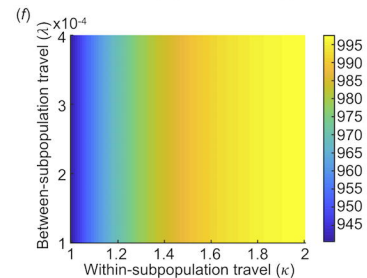

Total number infected  
(all outbreaks)

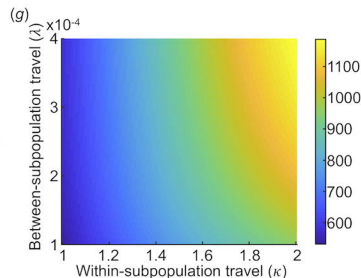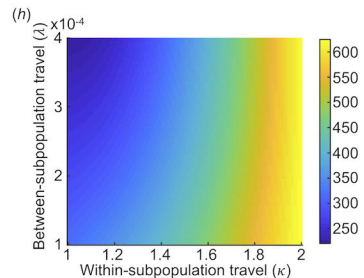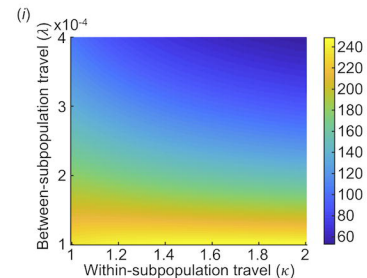

Source: https://www.biorxiv.org/content/10.1101/404871v1.full.pdf
